# Supplementary material for: MIG‐6 is essential for promoting glucose metabolic reprogramming and tumor growth in triple‐negative breast cancer
Source: PubMed Central journal article supplement — EMBO Rep. 2021 Mar 3;22(5):e50781. doi: 10.15252/embr.202050781 (PMC8097377; doi:10.15252/embr.202050781), 2021-03-03
Supplement: EMBR-22-e50781-s002.pdf [file EMBR-22-e50781-s002.pdf]

## **Table of Appendix Contents**

Appendix Figure S1. Correlation of MIG-6 and GLUT1 expression at the mRNA level.

Appendix Figure S2. Immunofluorescence multiplex assay for colocalization of MIG-6 and HIF1 $\alpha$  protein expression in TNBC tumor specimens.

Appendix Figure S3. MIG-6 tyrosine phosphorylation at Y394/Y395 in TNBC and lung cancer cells.

Appendix Figure Legends: Appendix Figure S1-S3

**A**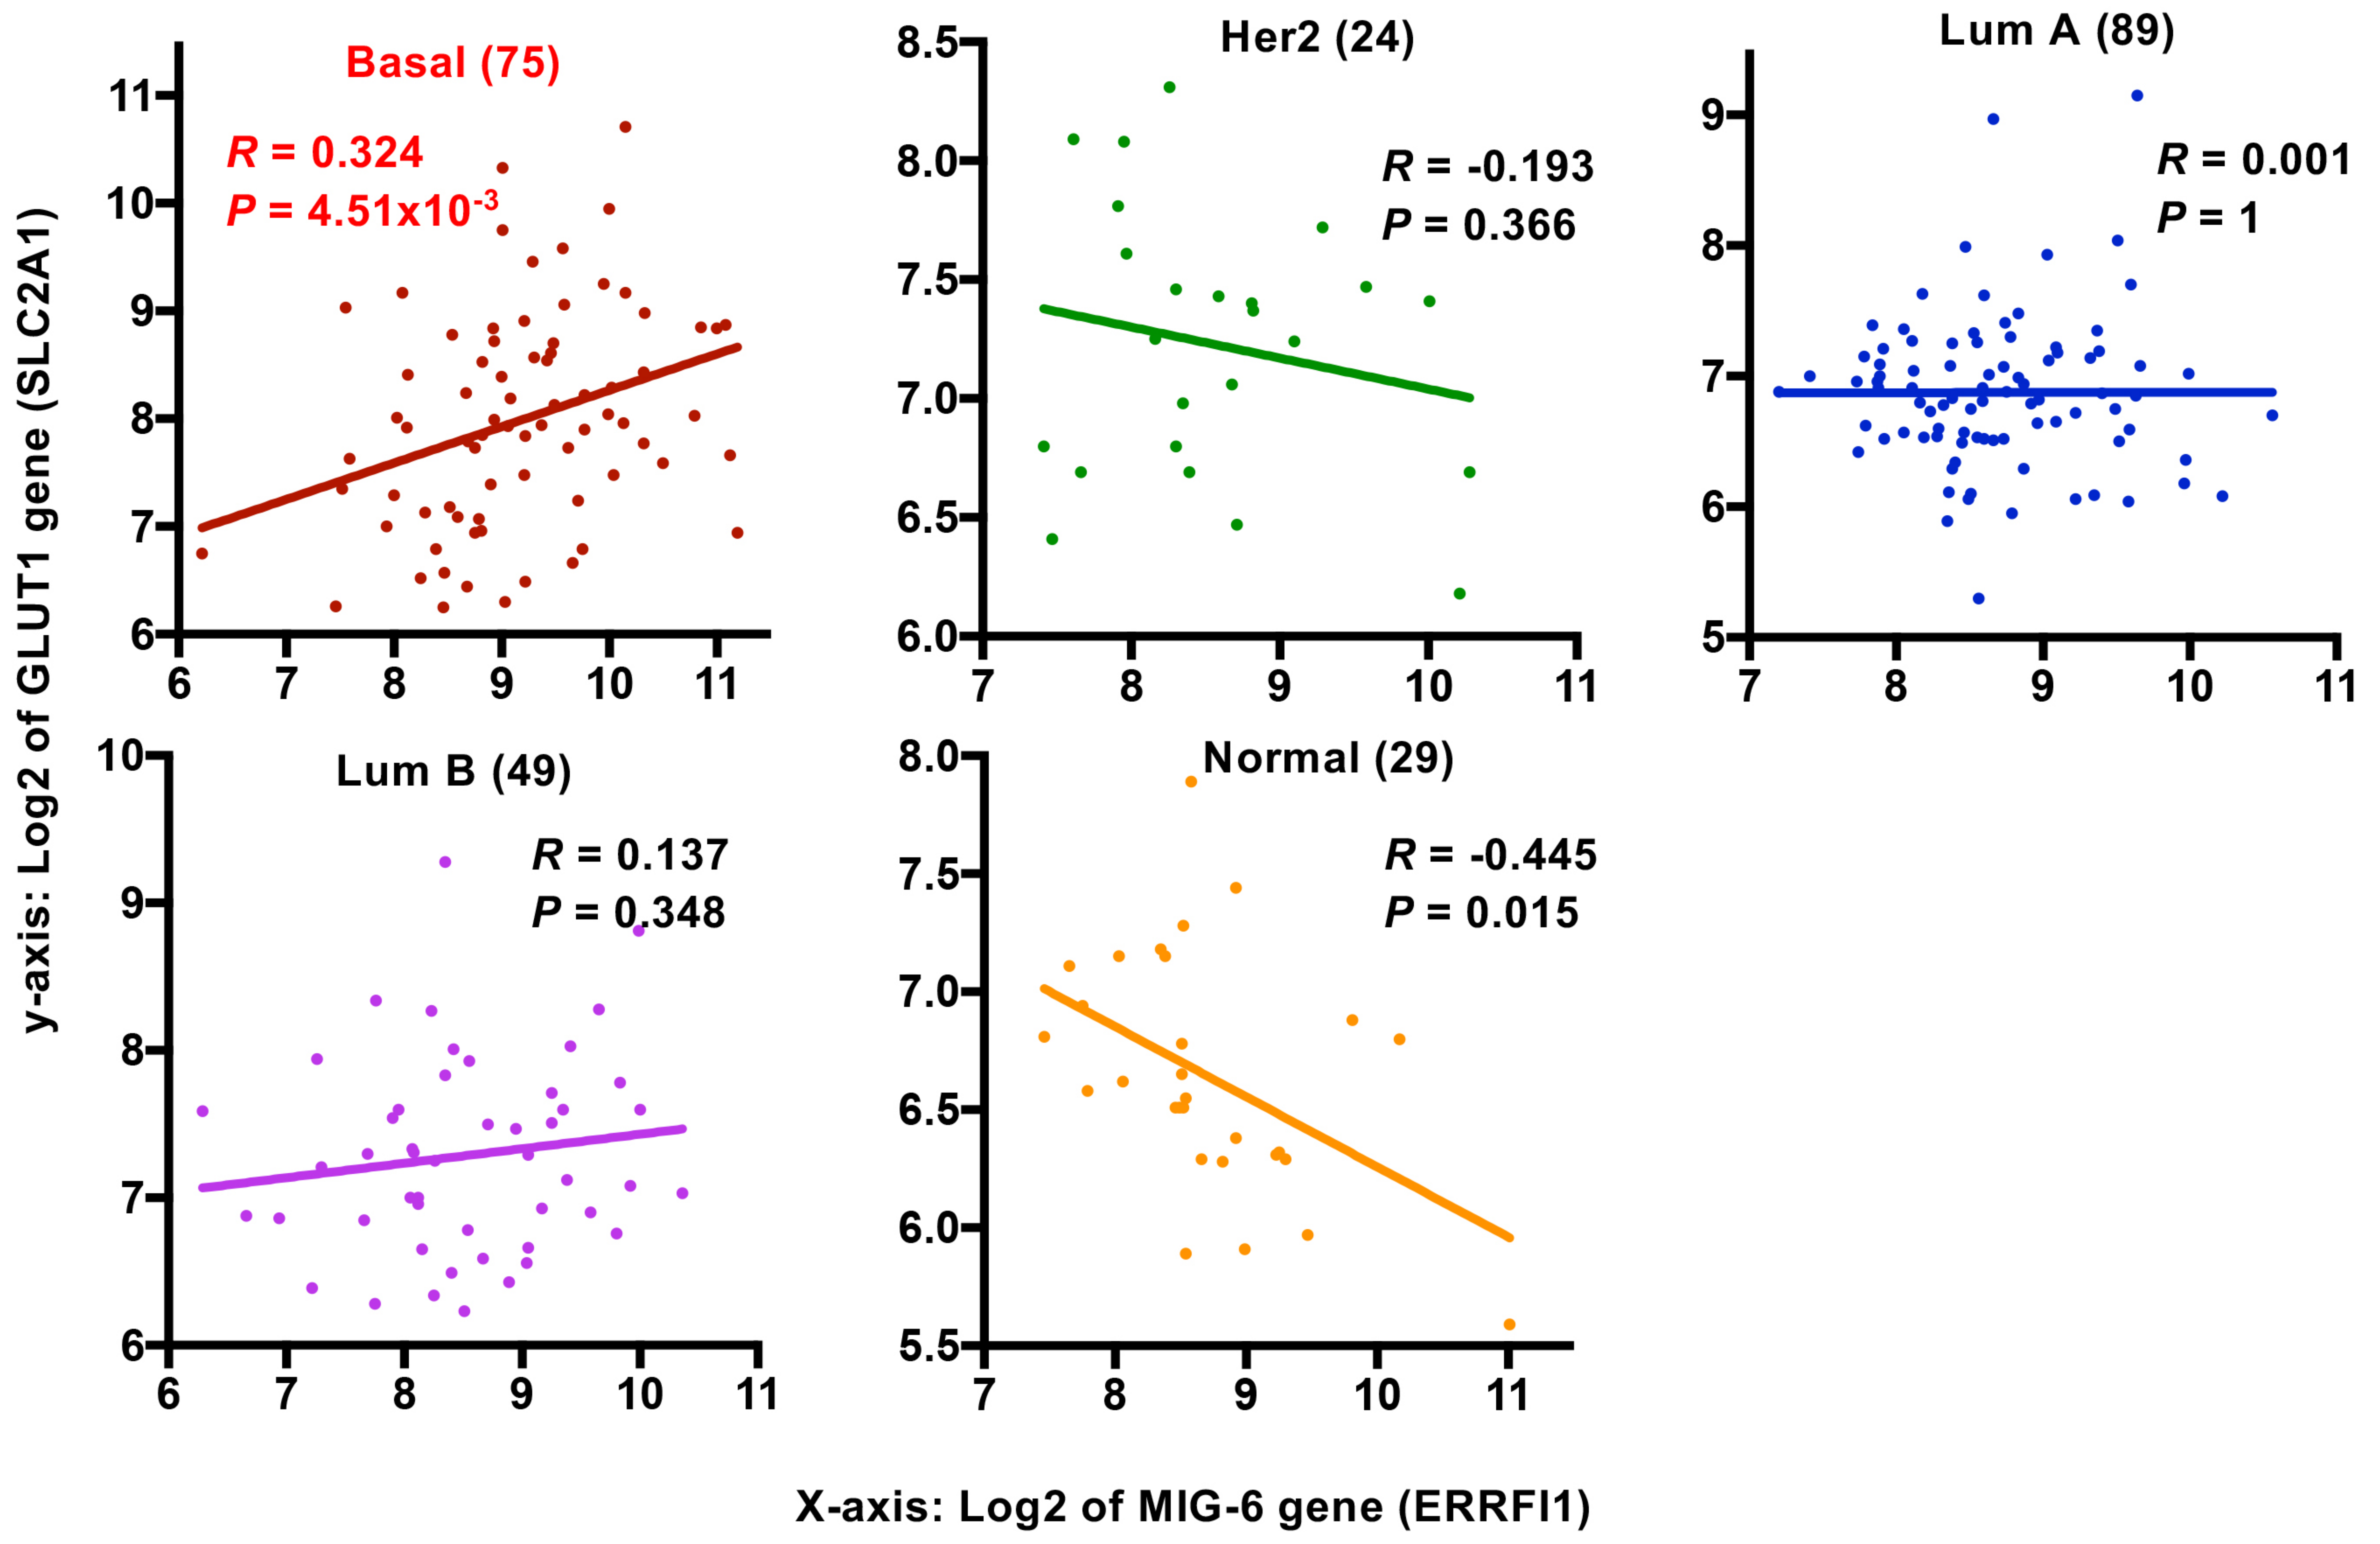**B**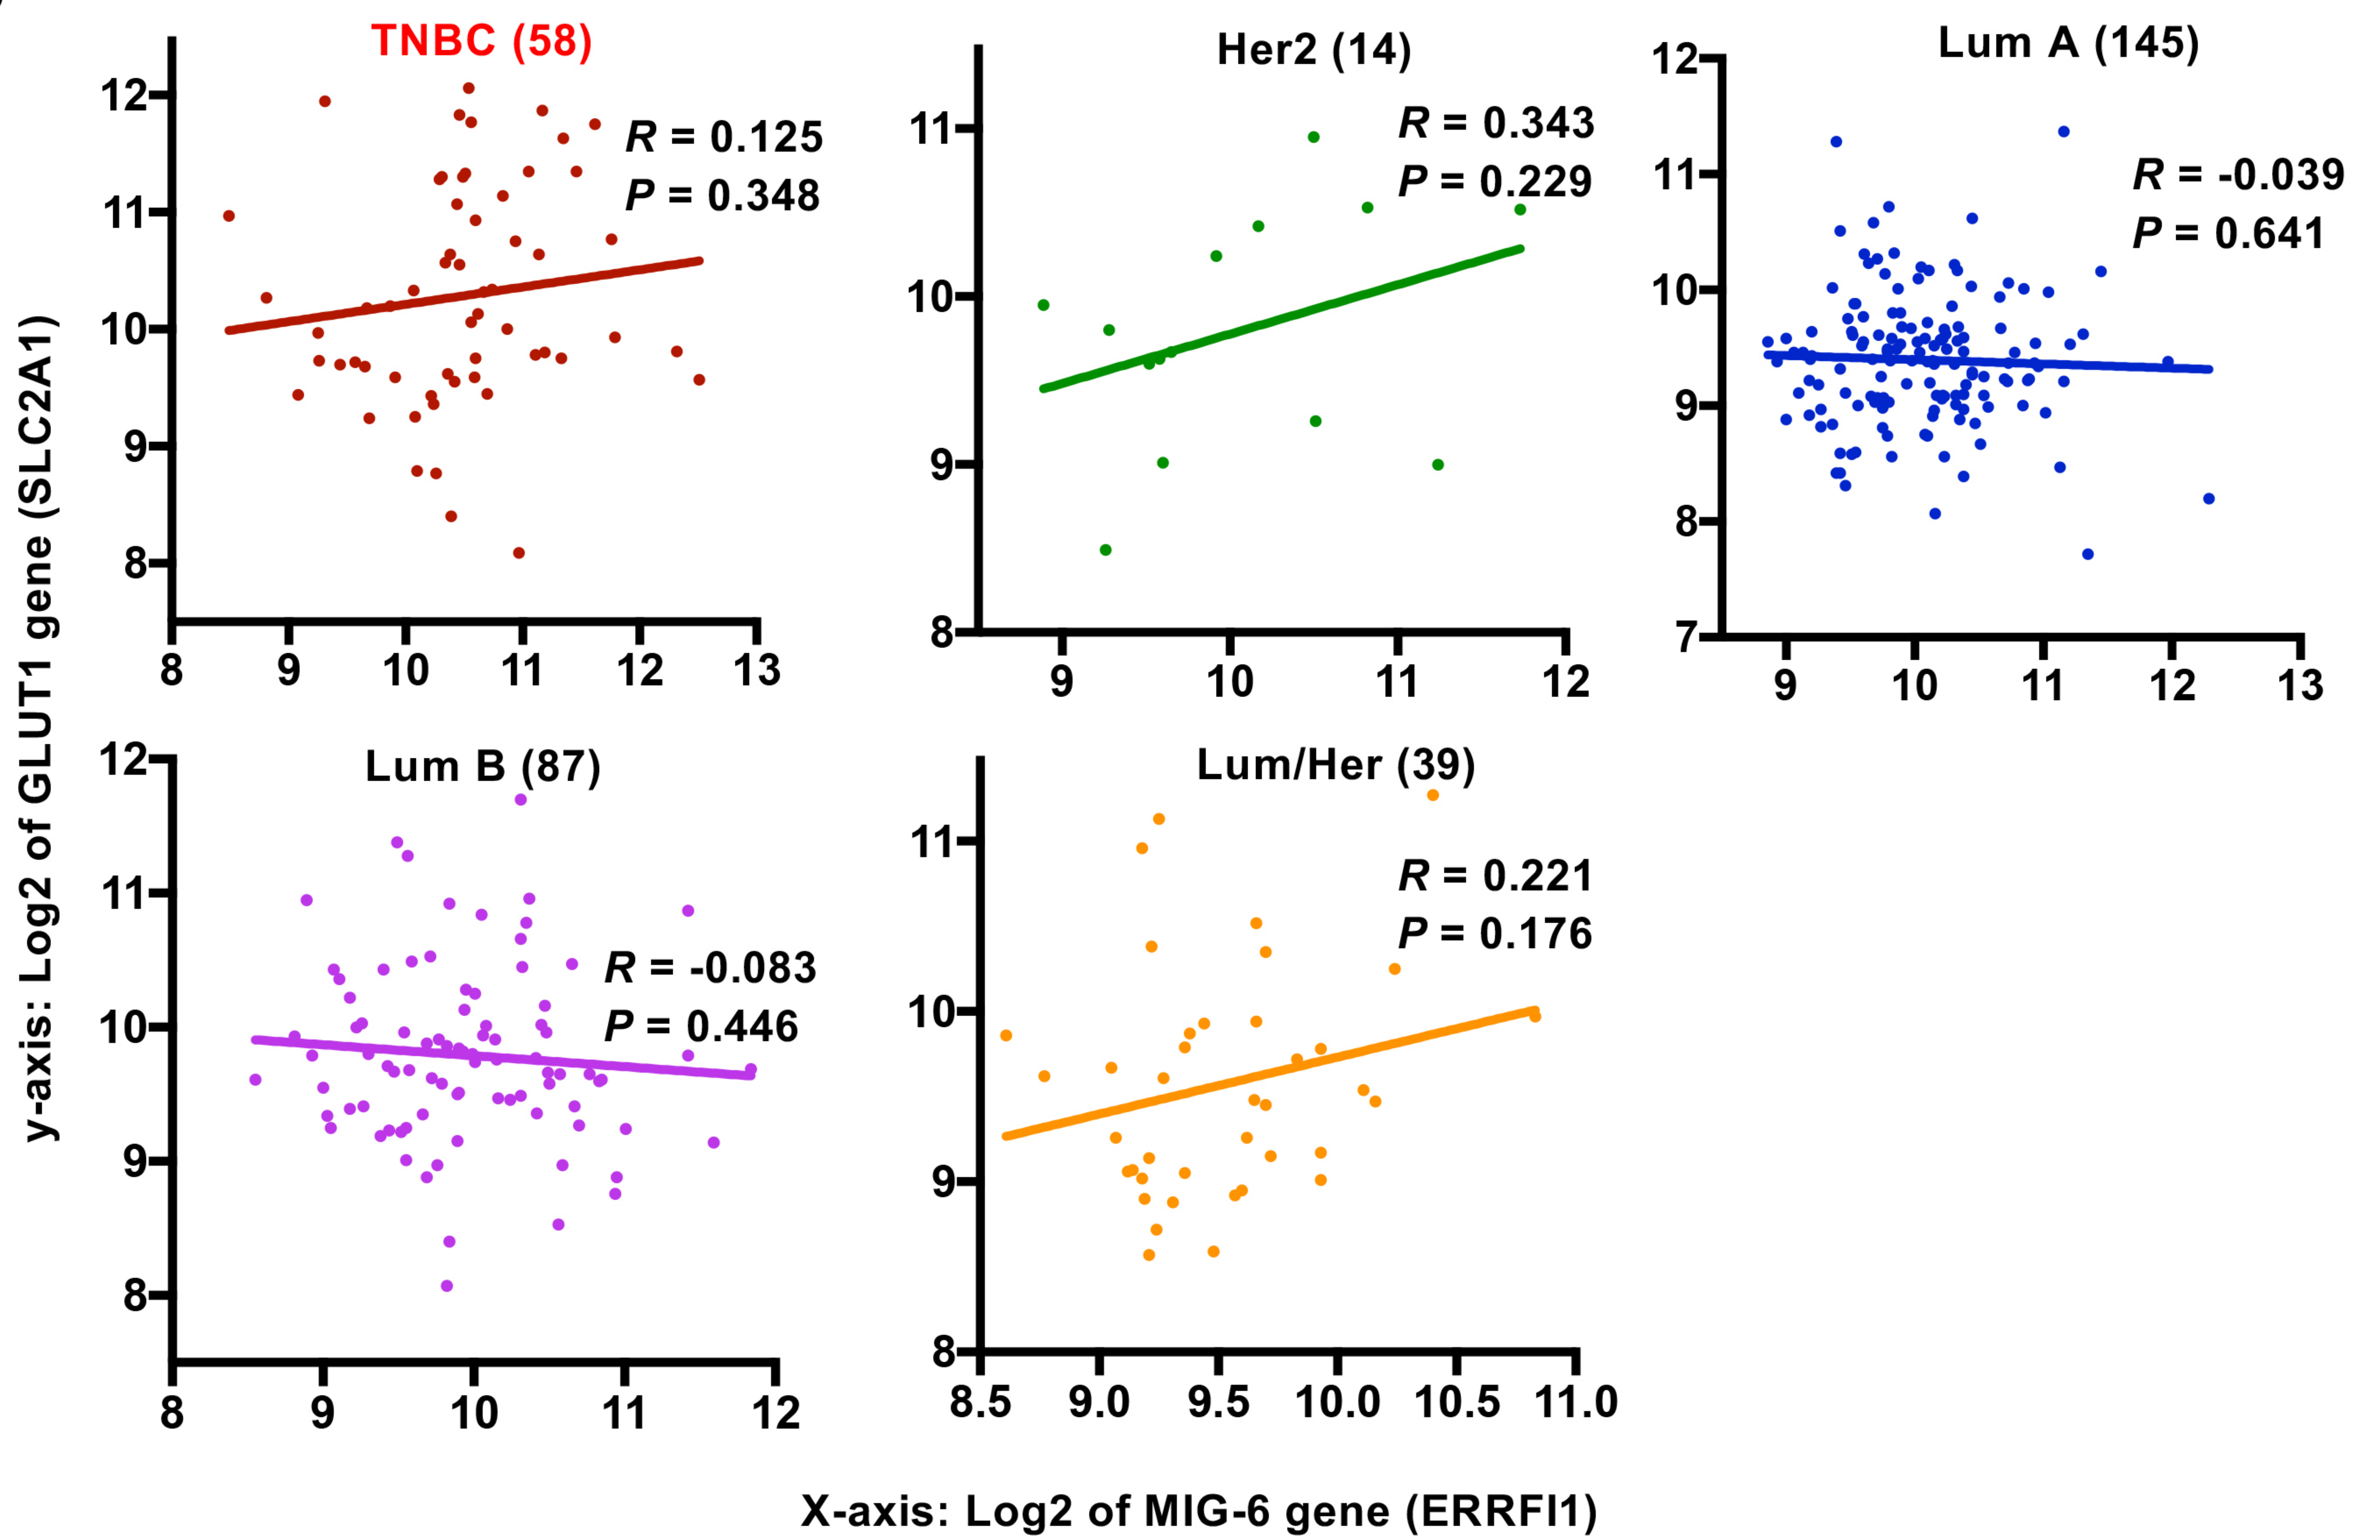

**A**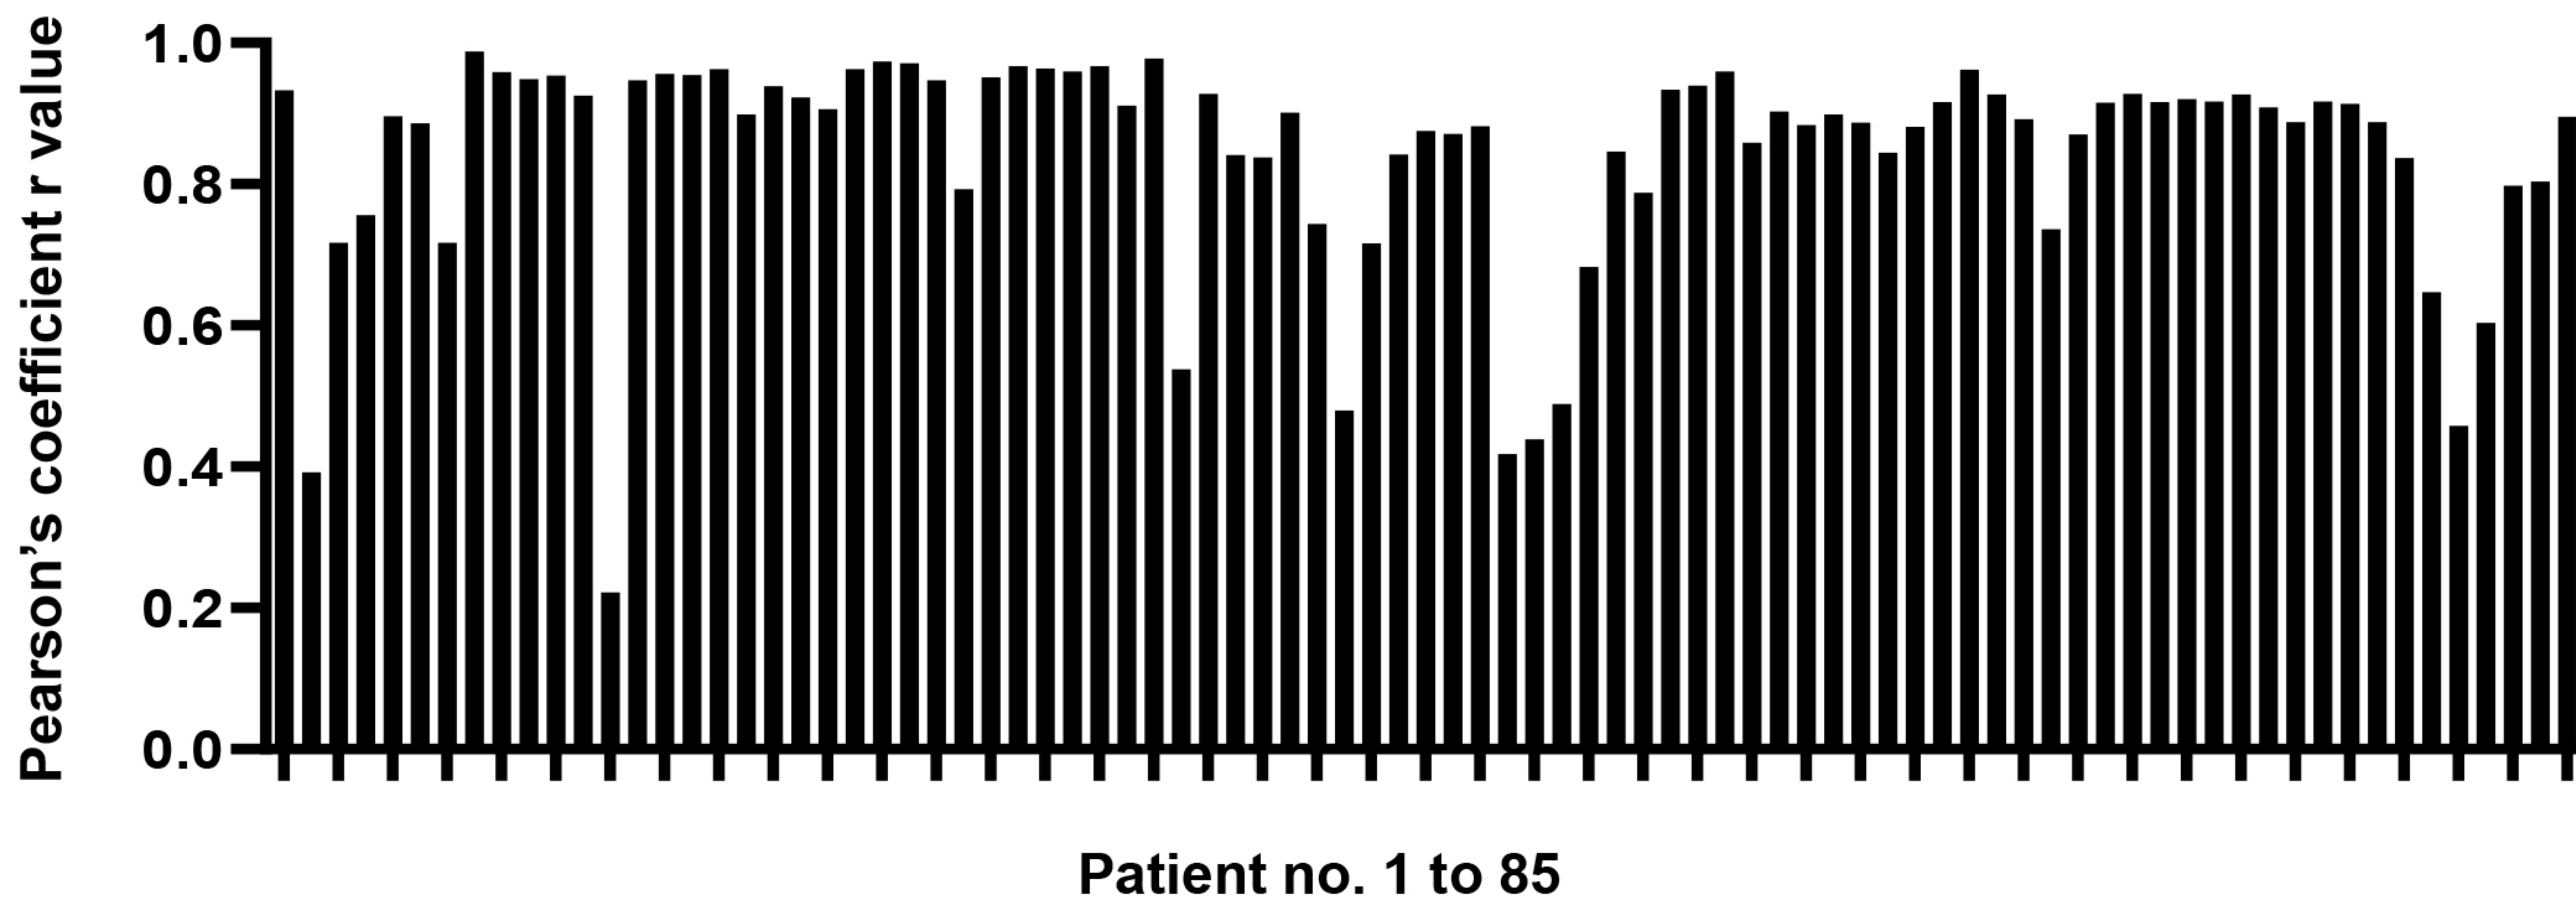**B**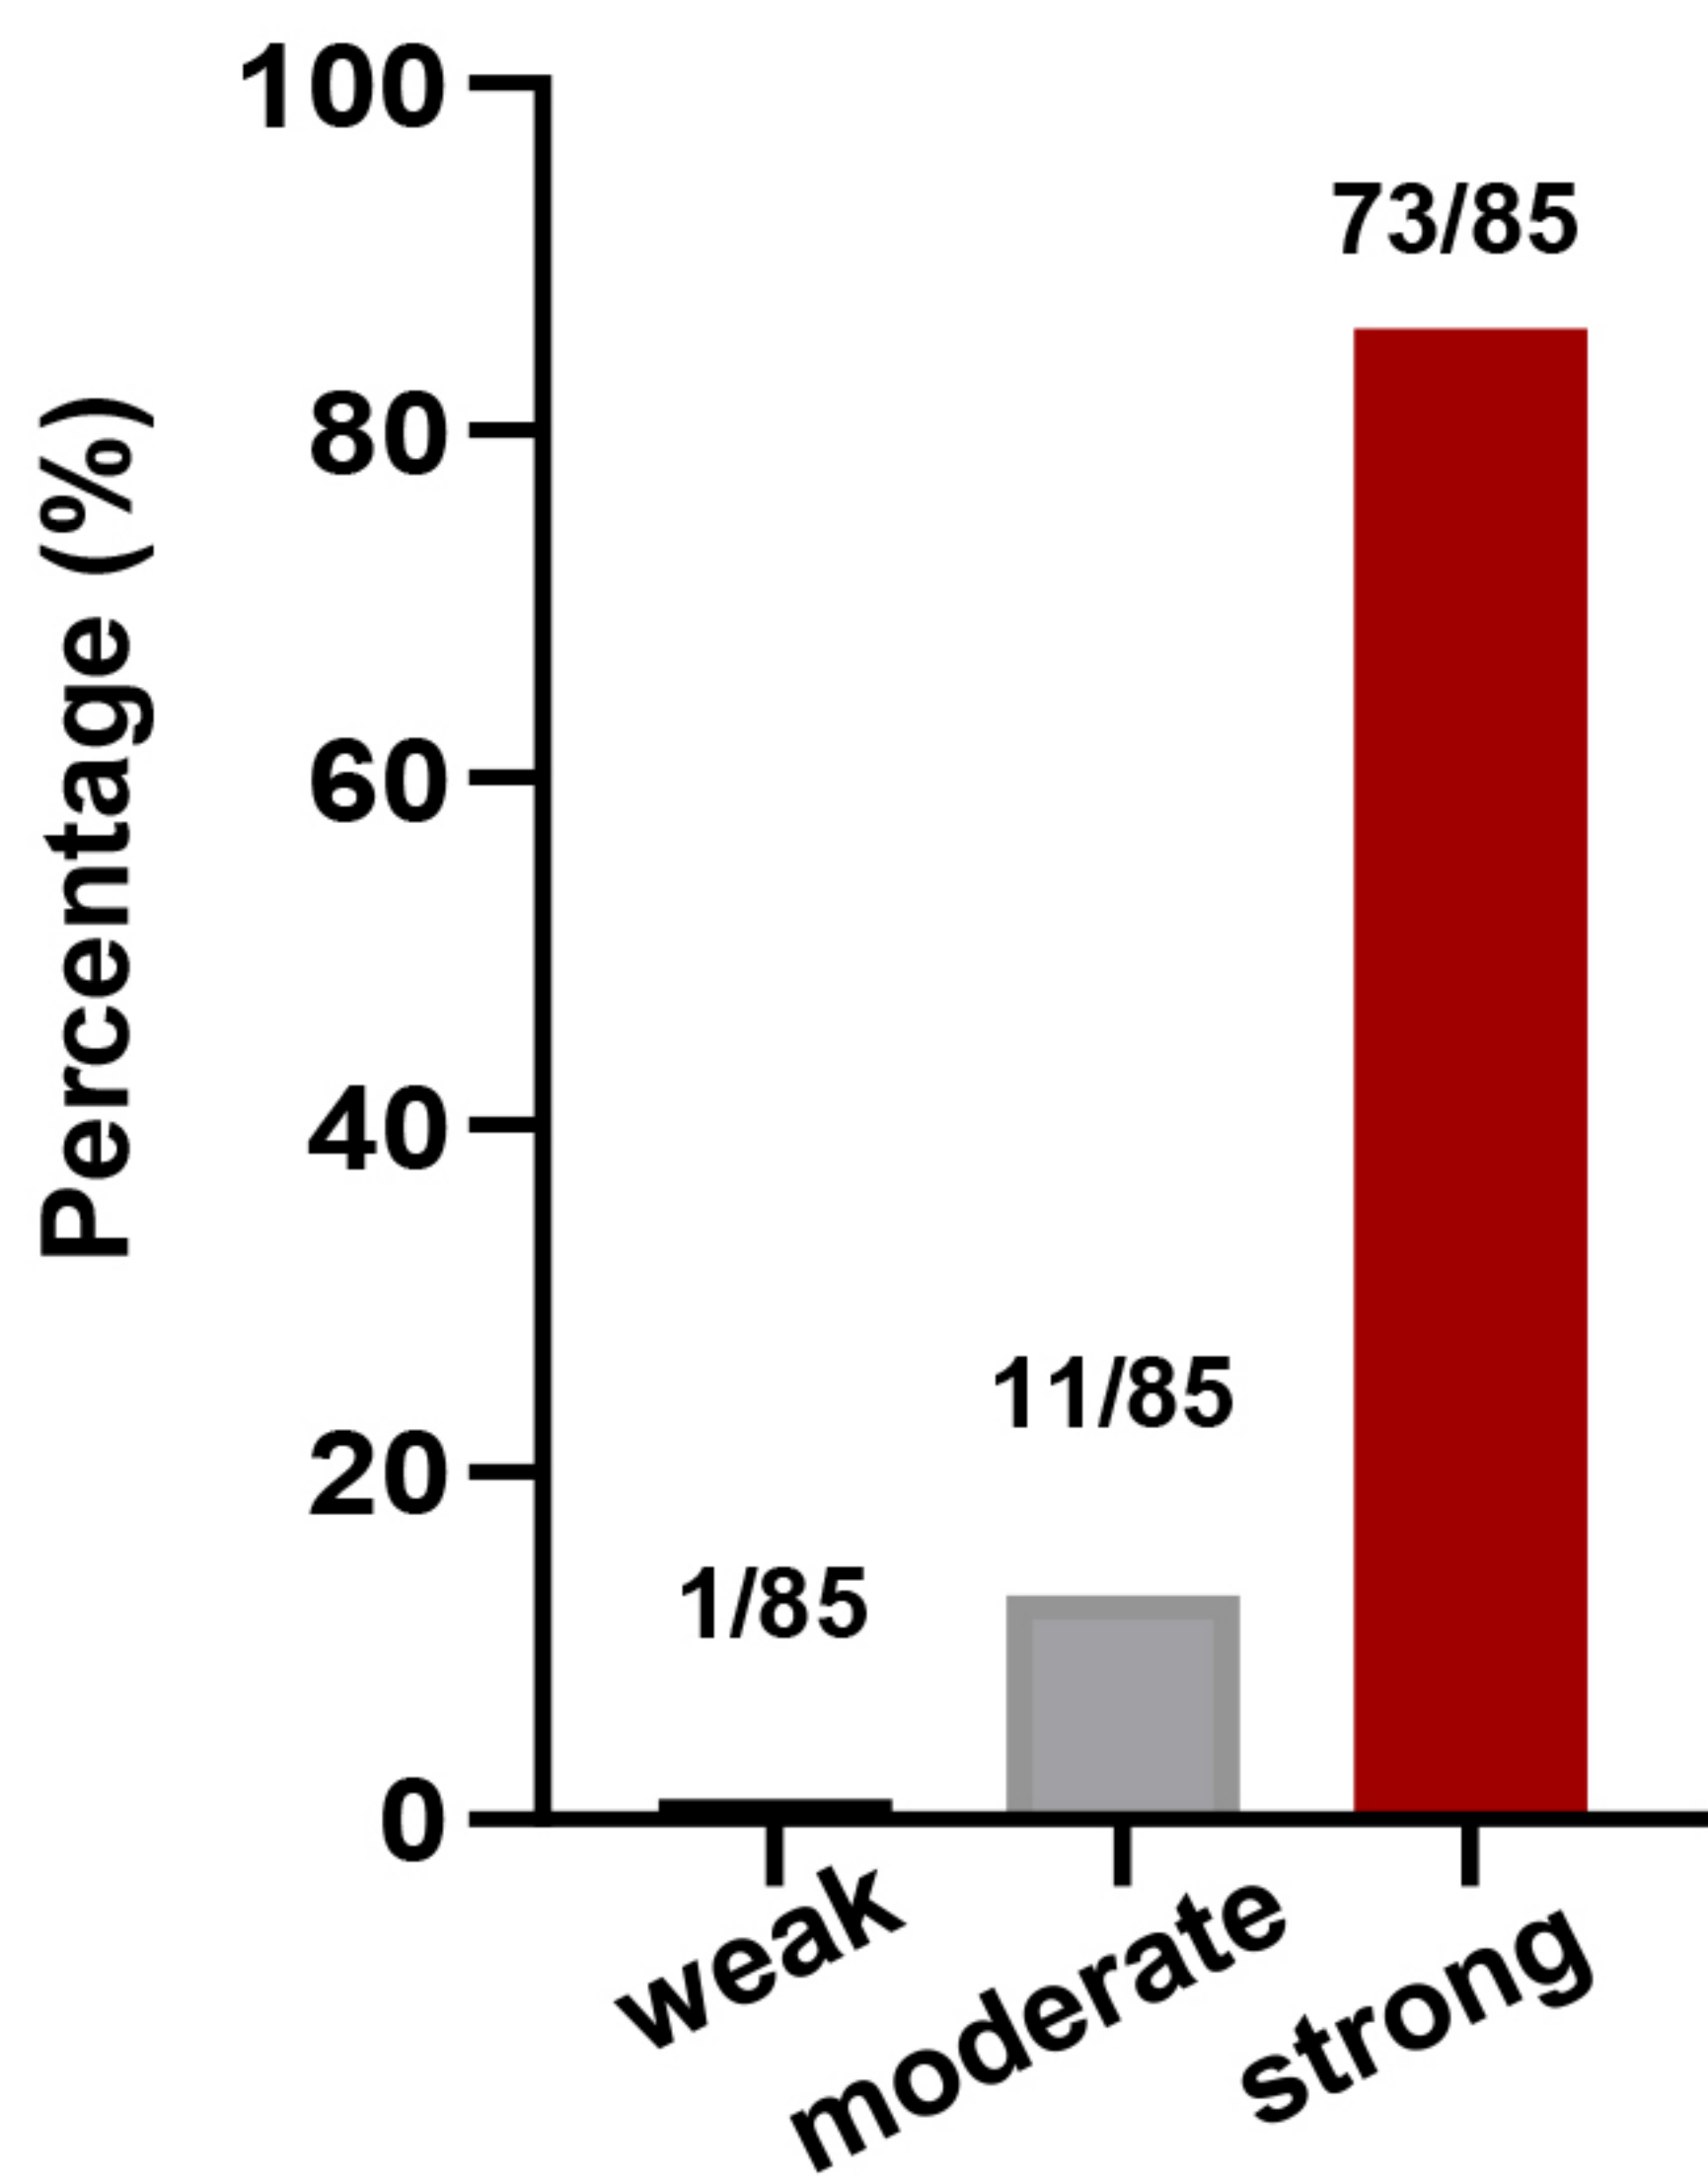

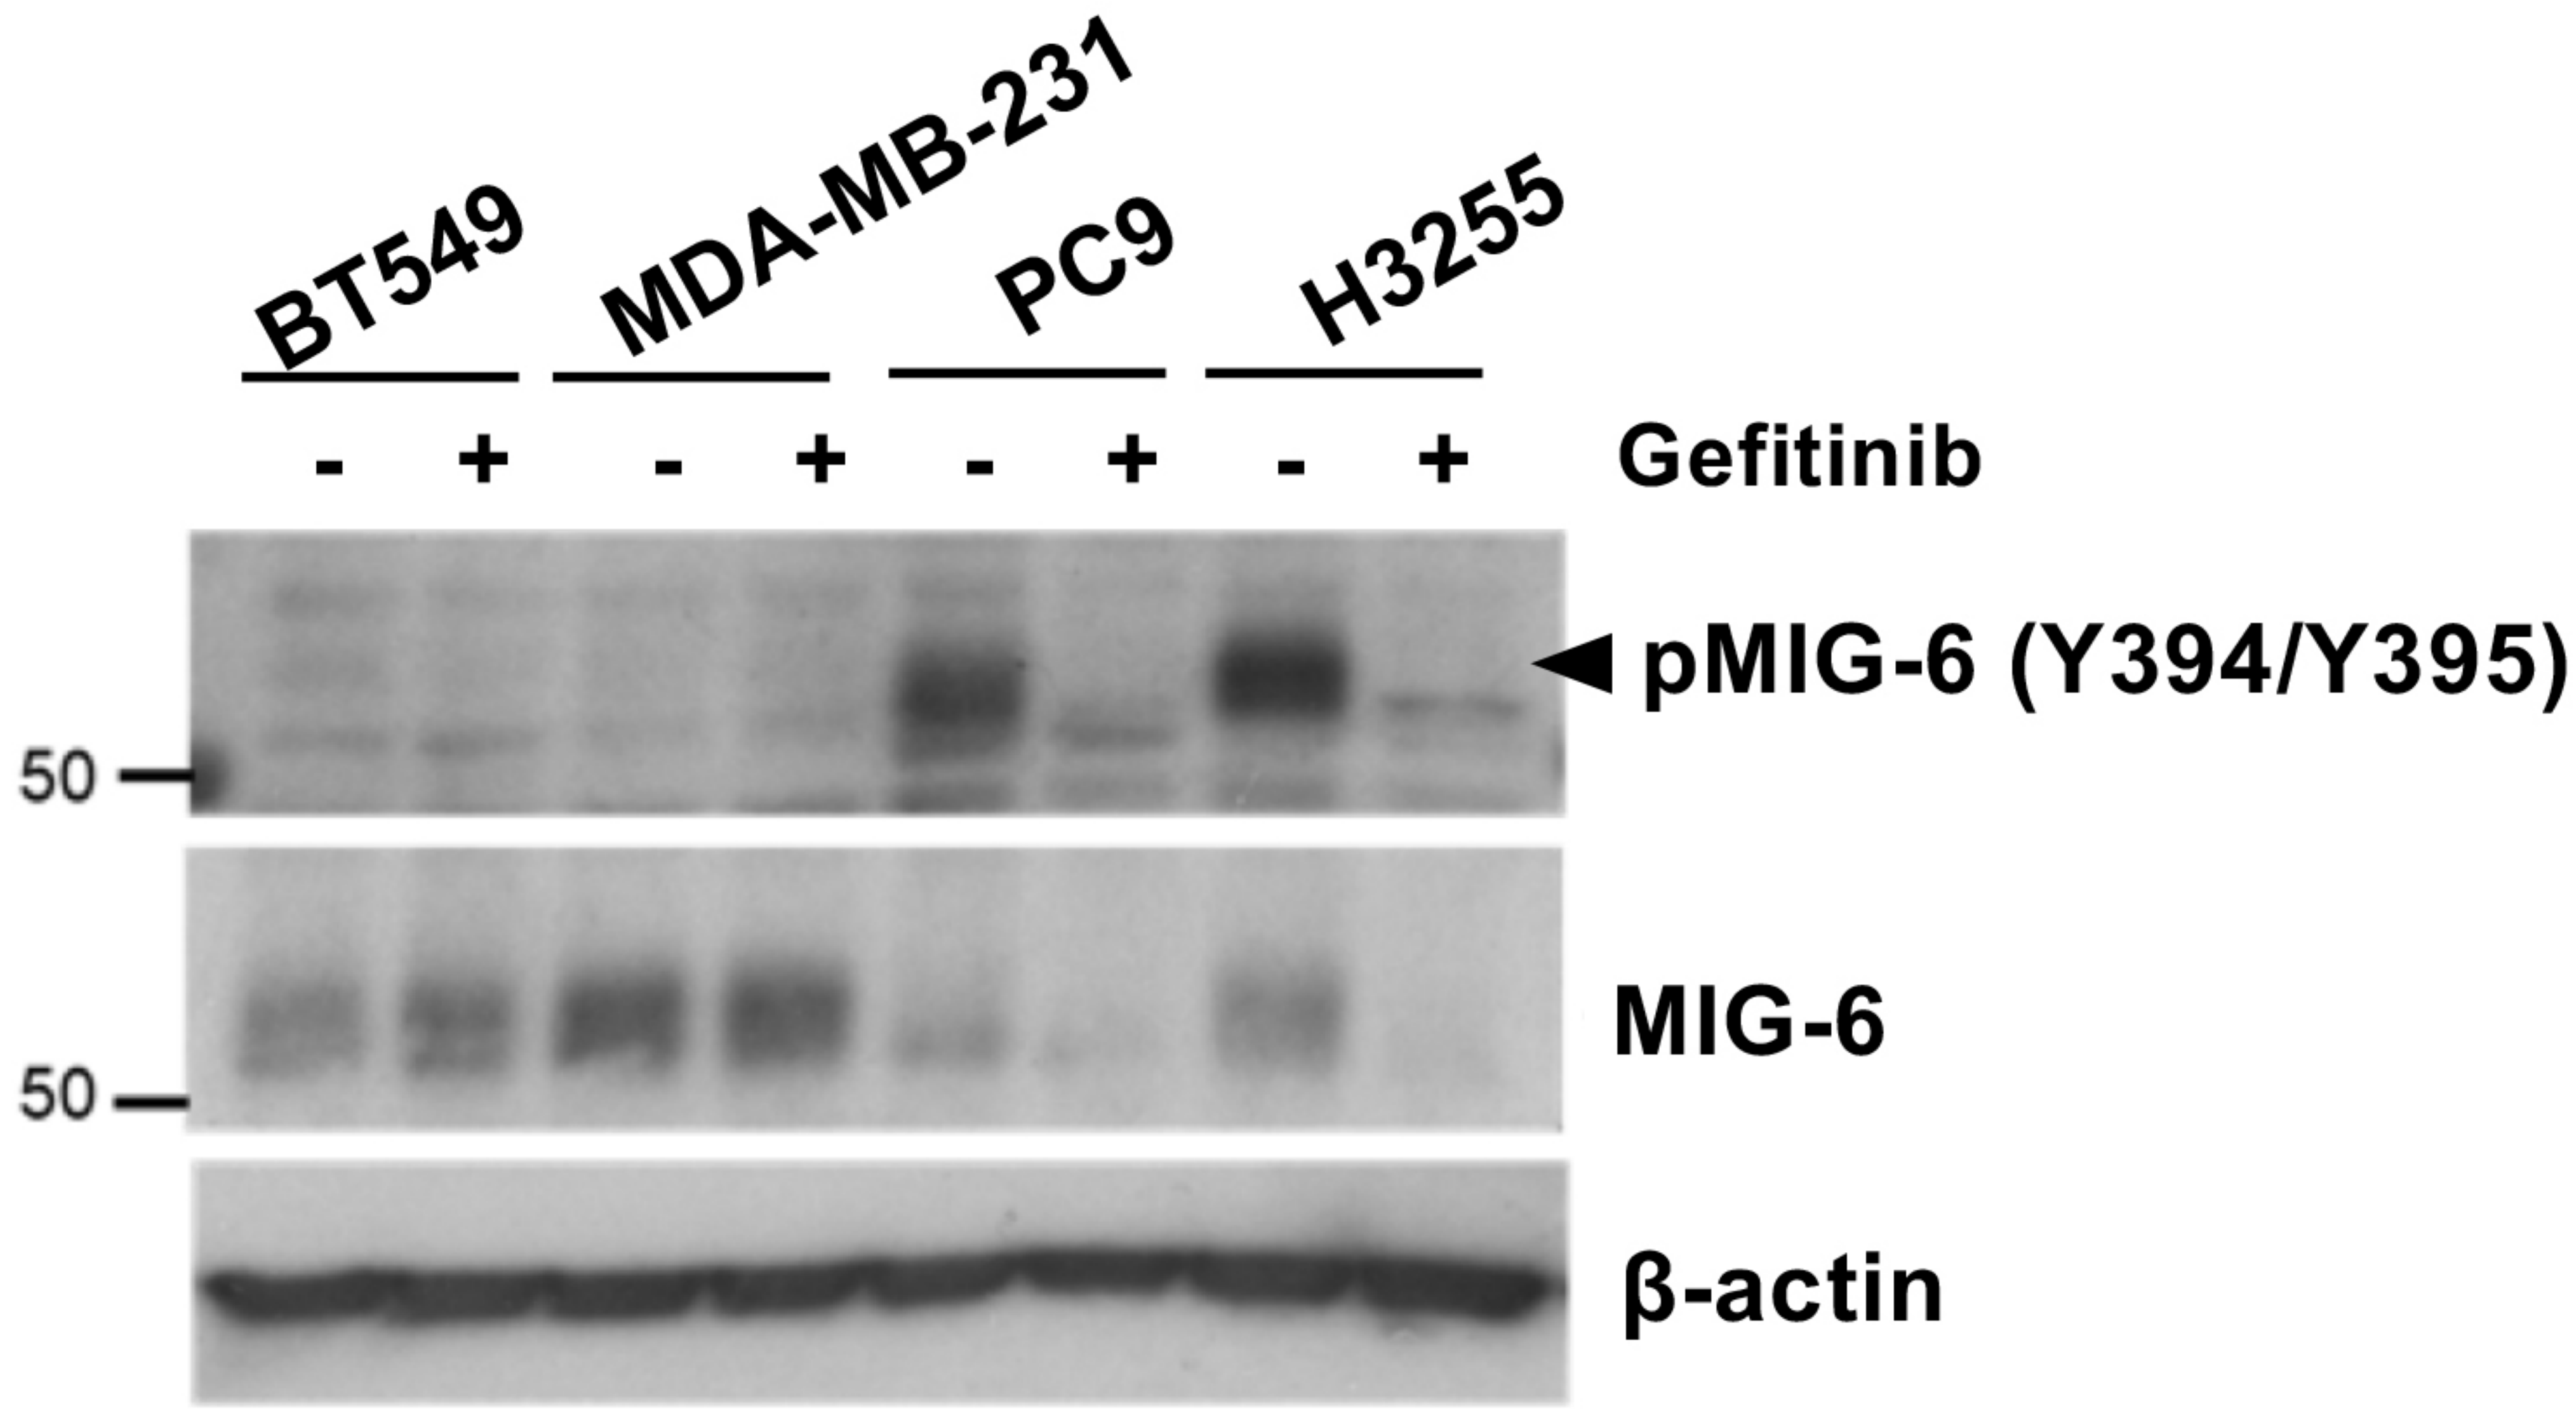

## Appendix Figure Legends

**Appendix Figure S1. Correlation of MIG-6 and GLUT1 expression at the mRNA level.** (A and B) Scatterplot analysis for the correlation between GLUT1 and MIG-6 mRNA expression in various breast cancer subtypes in the Bertucci (A) and Servant (B) datasets of breast cancer carcinomas, analyzed using Illumina HumanWG-6\_v3 Arrays. The gene expression levels are determined using the R2 platform. Pearson's correlation coefficient ( $r$ ) and  $p$  values are shown for each analysis.

**Appendix Figure S2. Immunofluorescence multiplex assay for colocalization of MIG-6 and HIF1 $\alpha$  protein expression in TNBC tumor specimens.** (A) The colocalization efficiency of MIG-6 and HIF1 $\alpha$  in 85 TNBC tumors is determined by Pearson's Correlation Coefficient ( $r$ ) value using the JaCoP plugin from ImageJ software. (B) The bar graph shows the percentage of tumors with a weak, moderate, or strong correlation between MIG-6 and HIF1 $\alpha$  protein expression ( $n=85$ ).  $r < 0.3$ , weak correlation;  $0.3 \leq r < 0.7$ , moderate correlation;  $r \geq 0.7$ , strong correlation.

**Appendix Figure S3. MIG-6 tyrosine phosphorylation at Y394/Y395 in TNBC and lung cancer cells.** Immunoblotting analysis for MIG-6 tyrosine phosphorylation at Y394/Y395 in TNBC and lung cancer cells in the absence and presence of gefitinib.
