# Supplementary material for: MIG‐6 is essential for promoting glucose metabolic reprogramming and tumor growth in triple‐negative breast cancer
Source: PubMed Central journal article supplement — EMBO Rep. 2021 Mar 3;22(5):e50781. doi: 10.15252/embr.202050781 (PMC8097377; doi:10.15252/embr.202050781), 2021-03-03
Supplement: EMBR-22-e50781-s006.pdf [file EMBR-22-e50781-s006.pdf]

## Expanded View Figures

### Figure EV1. Examination of MIG-6 genetic alterations in different breast cancer subtypes.

- A cBioPortal was used to access and visualize TCGA data for MIG-6 (*ERRFI1*) gene expression in 321 luminal and 58 HER2-enriched breast cancer subtypes. Each column represents an individual sample. The table at the bottom summarizes the frequency (%) of genetic alterations of the MIG-6 gene in different breast cancer subtypes.
- B Box plots show the MIG-6 (*ERRFI1*) gene expression in different breast tumor subtypes in the Bertucci dataset of 266 primary breast cancer carcinomas, analyzed using Illumina HumanWG-6\_v3 Arrays. The gene expression levels are determined using the R2 platform. In the box plot, error bars are the 95% confidence interval, the bottom and top of the box are the 25<sup>th</sup> and 75<sup>th</sup> percentiles, the line inside the box is the 50<sup>th</sup> percentile (median), and any outliers are shown as open circles. **\*\*P < 0.01**, by Student's t-test.
- C The bar graph shows the wide distribution of MIG-6 protein expression across the 85 tumor samples used for IHC staining.

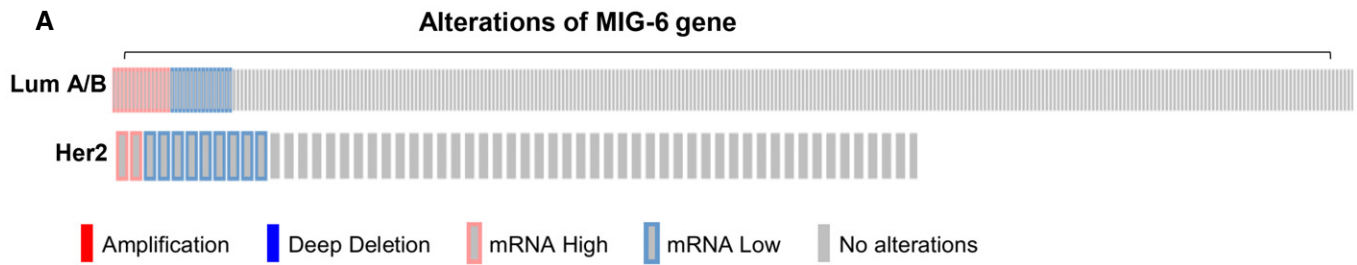

Summary of *ERRF1* (MIG-6 gene) alteration

| Percentage    | upregulation/amplification | downregulation/deletion | total cases |
|---------------|----------------------------|-------------------------|-------------|
| Luminal A/B   | 5%                         | 5%                      | 321         |
| Her2 enriched | 3%                         | 16%                     | 58          |
| Basal         | 19%                        | 3%                      | 81          |

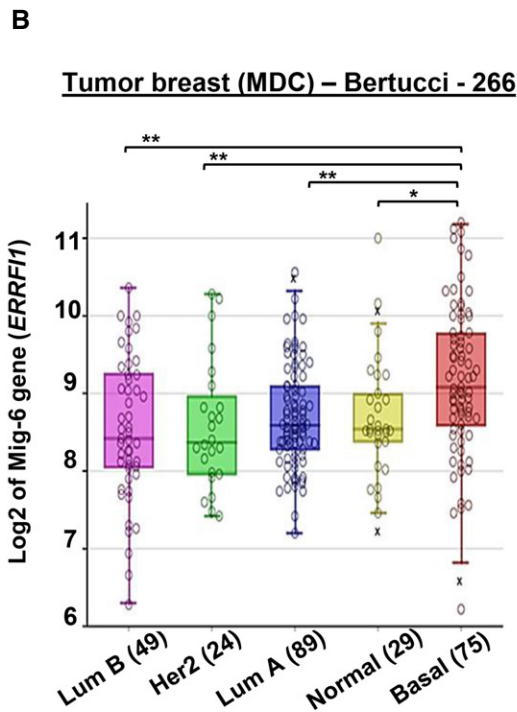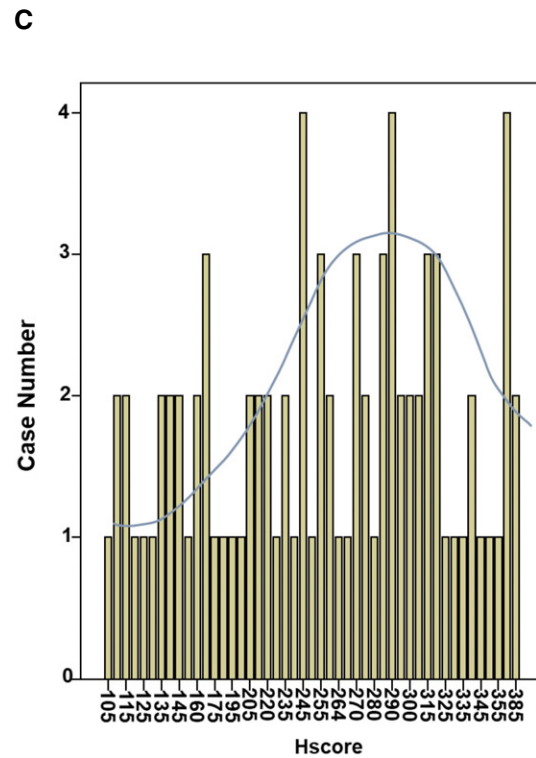

Figure EV1.

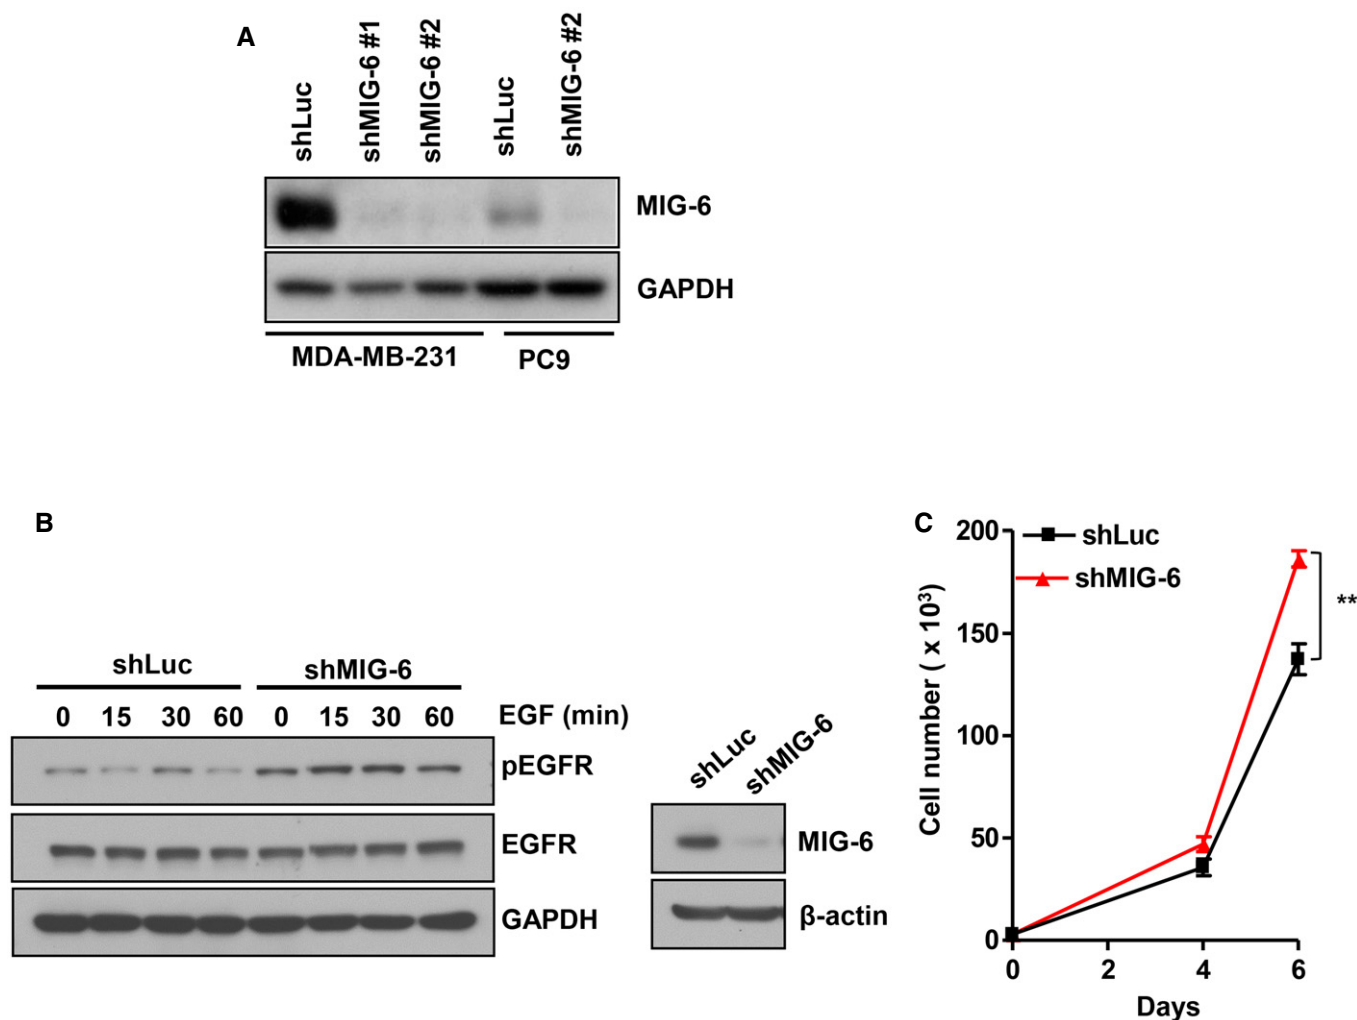

**Figure EV2. MIG-6 deficiency promotes EGFR signaling and cell growth in lung cancer cells.**

- A Immunoblotting analysis for MIG-6 expression in Luciferase and MIG-6 knockdown MDA-MB-231 and PC9 cells.  
 B Immunoblotting analysis for phosphorylation and protein expression of EGFR in Luciferase and MIG-6 knockdown PC9 cells. Cells were serum-starved, treated with EGF for various time periods, and harvested for immunoblotting analysis.  
 C Cell proliferation and immunoblotting assays in Luciferase and MIG-6 knockdown PC9 cells ( $n = 3$ ). The quantified results are presented as mean  $\pm$  SD.  $**P < 0.01$ , by Student's *t*-test.

**Figure EV3. MIG-6 reprograms glucose metabolism toward glycolysis.**

- A Immunoblotting analysis for MIG-6 expression in breast cancer cells under normoxia (N) and hypoxia (H).  
 B Oxygen consumption rate (OCR) in BT549 cells with GFP or MIG-6 knockdown ( $n = 15$ ; biological replicates).  
 C Quantitative results for basal OCR in the GFP and MIG-6 knockdown BT549 cells indicated by the orange box in Fig EV3B ( $n = 15$ ).  
 D Quantitative results for maximal OCR in the GFP and MIG-6 knockdown BT549 cells indicated by the green box in Fig EV3B ( $n = 15$ ).  
 E Histograms show the percentage of up/downregulated genes in the pentose phosphate pathways (left), gluconeogenesis (middle), and glycogen metabolism pathways (right) whose expressions were affected by MIG-6 knockdown in BT549 cells. For each gene, the change was calculated based on the equation: (shGFP-shMIG6)/shMIG-6 ( $n = 3$ ).  
 F Lactate production assay in MDA-MB-231 cells with Luciferase or MIG-6 knockdown ( $n = 3$ ).  
 G Lactate production assay in GFP and MIG-6 knockdown BT549 cells with or without gefitinib treatment for 72 h ( $n = 3$ ).

Data information: The quantified results are presented as mean  $\pm$  SEM.  $*P < 0.05$ ,  $**P < 0.01$ , by Student's *t*-test.

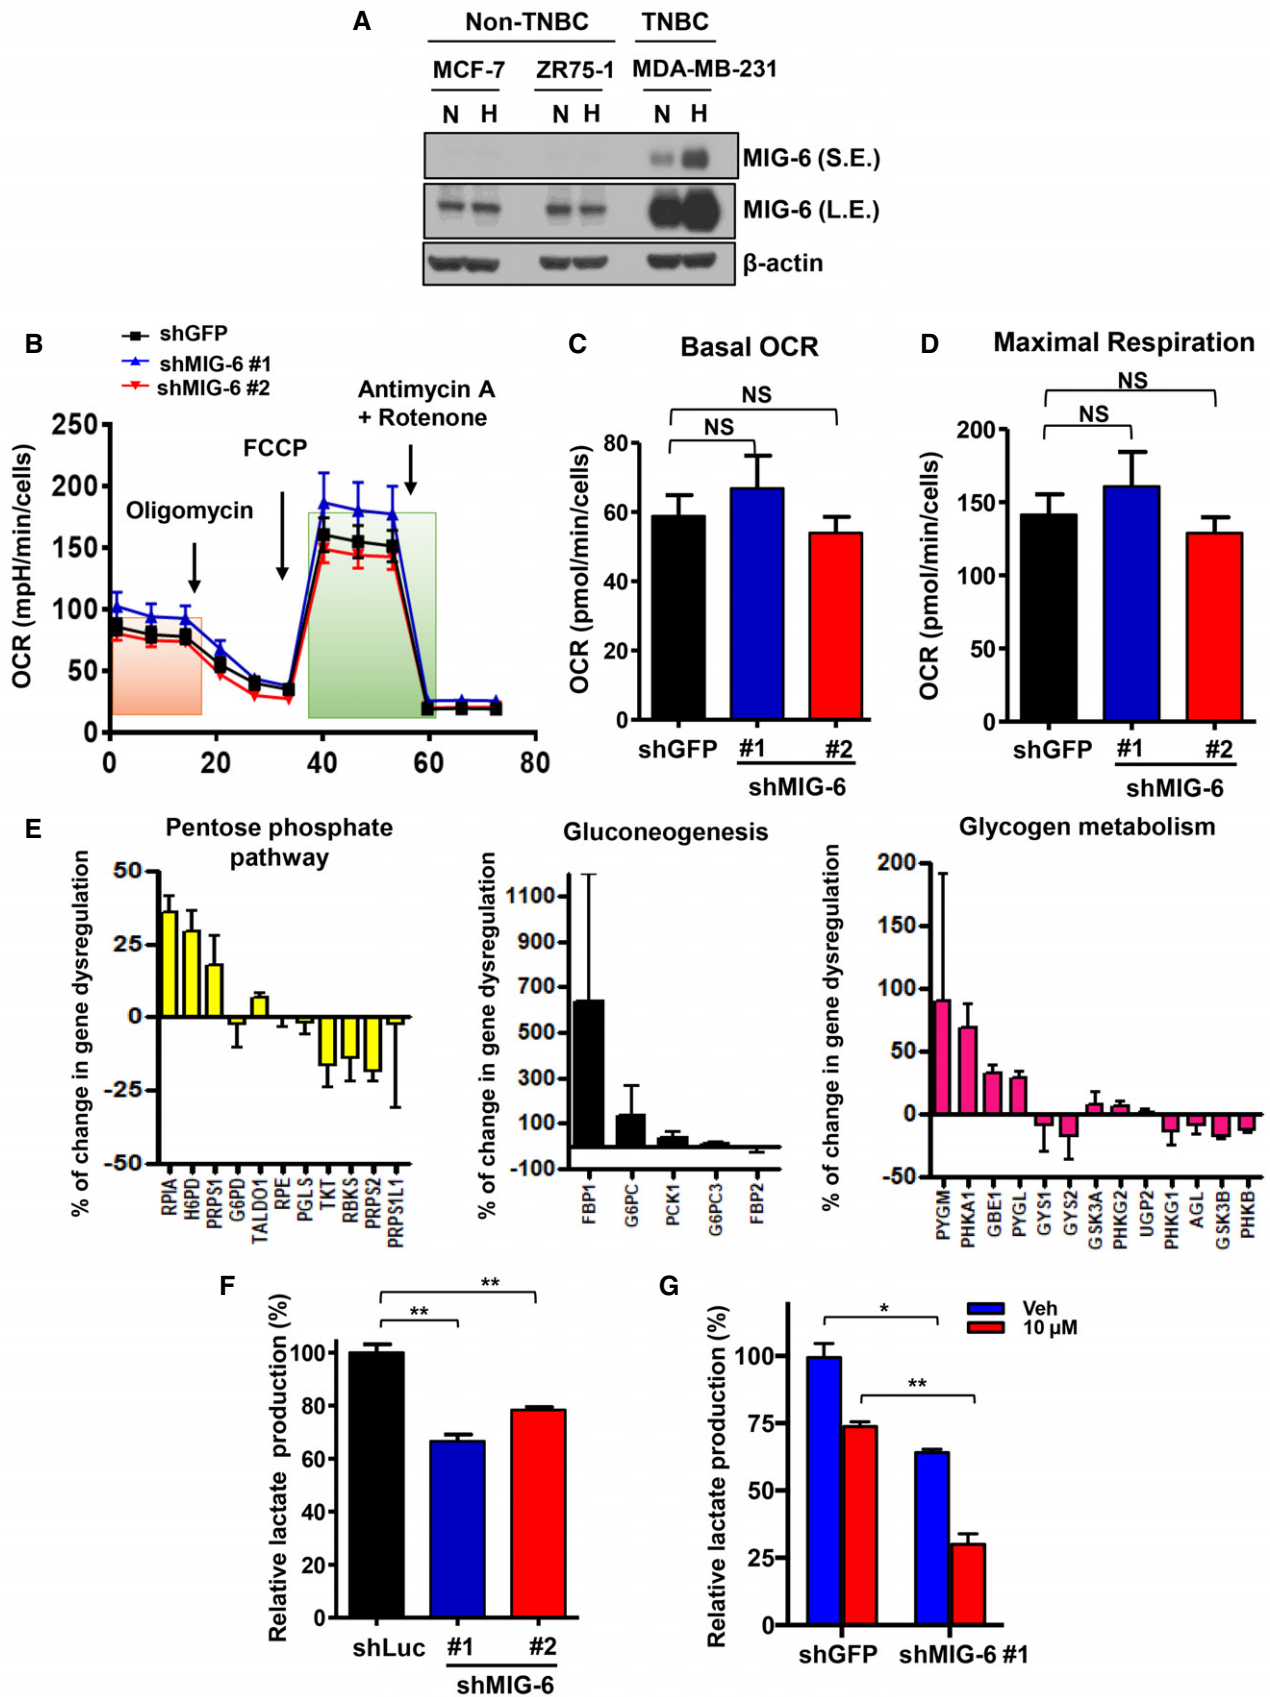

Figure EV3.

**Figure EV4. MIG-6 depletion reduces the expression of GLUT1.**

- A Box plots show the GLUT1 (*SLC2A1*) gene expression in different breast tumor subtypes in the Bertucci dataset of 266 primary breast cancer carcinomas, analyzed using Illumina HumanWG-6\_v3 Arrays. The gene expression levels are determined using the R2 platform. In the box plot, error bars are the 95% confidence interval, the bottom and top of the box are the 25<sup>th</sup> and 75<sup>th</sup> percentiles, the line inside the box is the 50<sup>th</sup> percentile (median), and any outliers are shown as open circles. \*\* $P < 0.01$ , by Student's *t*-test.
- B Immunoblotting analysis for GLUT1 protein expression in MDA-MB-231 cells with GFP or MIG-6 knockdown.
- C Immunoblotting analysis for GLUT1 expression in the membrane and cytosolic fractions in BT549 cells with GFP or MIG-6 knockdown. EGFR and  $\alpha$ -Tubulin served as markers for membrane and cytosolic fractions, respectively.
- D Immunoblotting analysis for GLUT1 expression in the membrane and cytosolic fractions of MDA-MB-231 cells with Luciferase or MIG-6 knockdown.

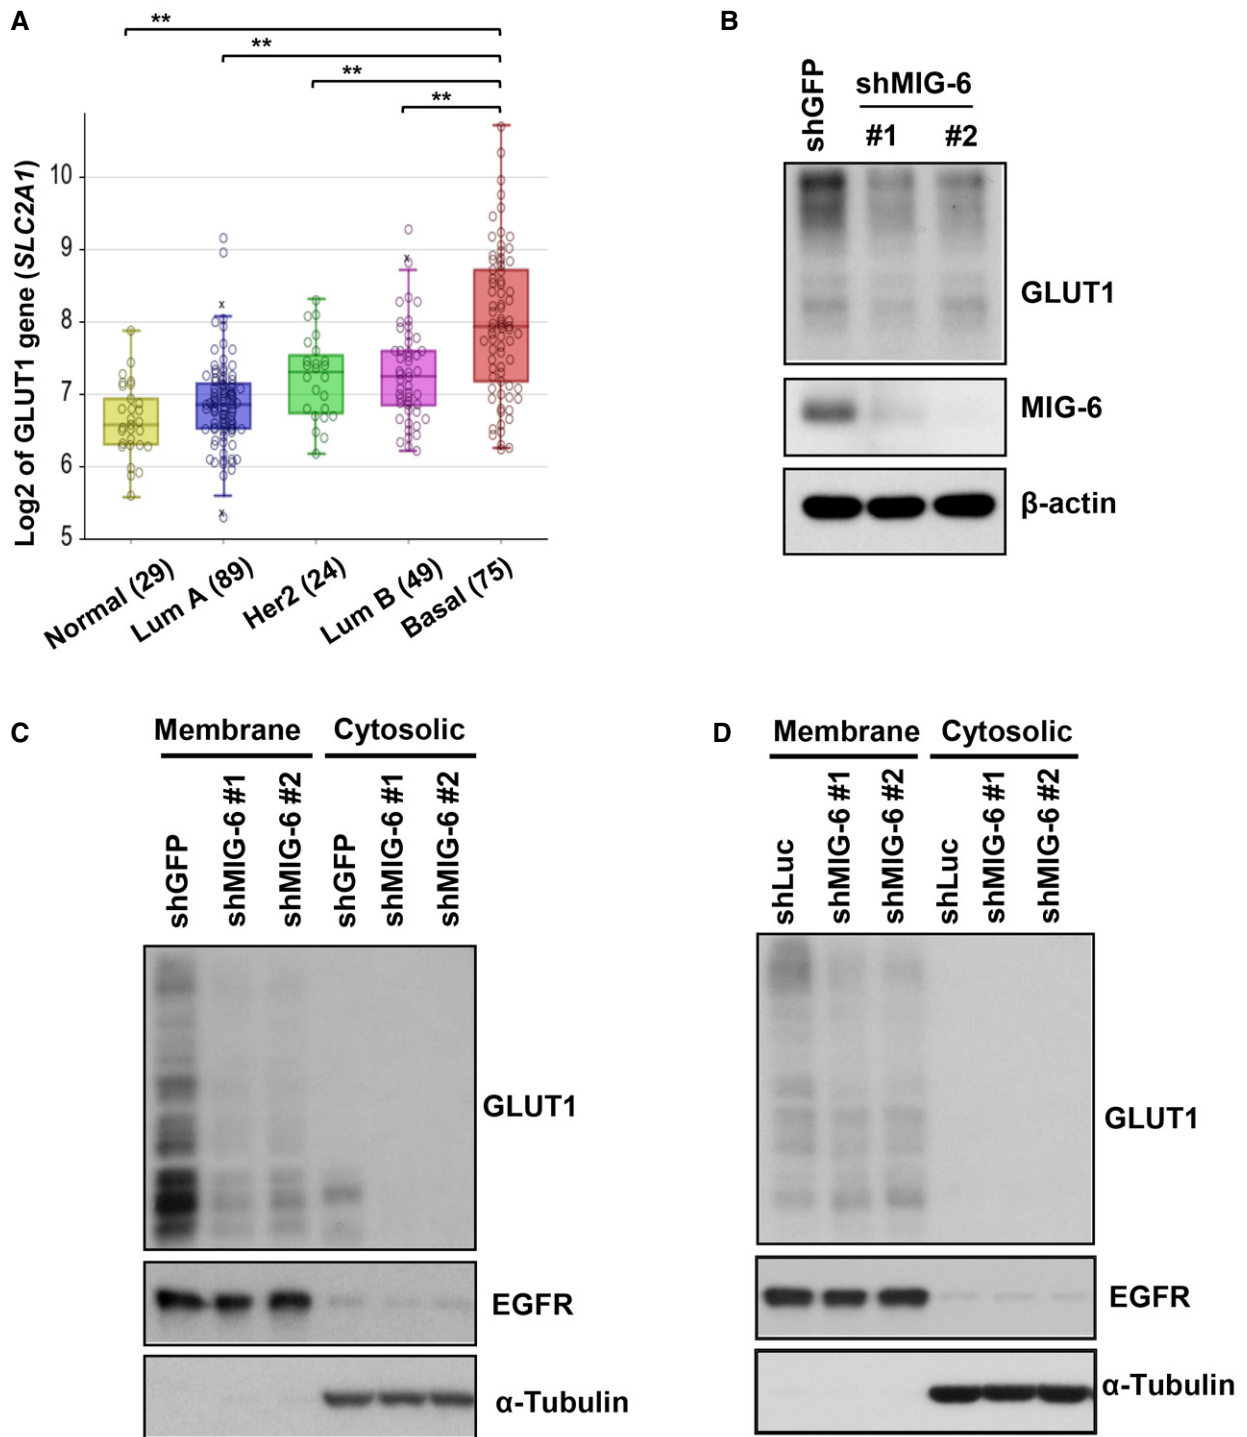

Figure EV4.

**Figure EV5. Characterization of the mechanism by which MIG-6 regulates GLUT1 expression.**

- A Immunoblotting analysis for HIF1 $\alpha$  expression in various breast cancer cells under normoxia (N) and hypoxia (H).
- B Immunoblotting analysis for cMyc protein expression in BT549 cells with GFP or MIG-6 knockdown.
- C Immunoblotting analysis for cMyc protein expression in MDA-MB-231 cells with GFP or MIG-6 knockdown.
- D Immunoblotting analysis for HIF1 $\alpha$  expression in response to MG132 treatment in BT549 cells with GFP or MIG-6 knockdown.
- E GFP and MIG-6 knockdown BT549 cells transfected with the indicated plasmids were treated with MG132, subjected to immunoprecipitation with the HA-tag antibody, followed by immunoblotting analysis.
- F Luciferase and MIG-6 knockdown BT549 cells were transfected with the indicated plasmids and subjected to MG132 treatment. Afterward, cells were harvested for IP with the HIF1 $\alpha$  antibody, followed by immunoblotting analysis to determine the level of K48-linked ubiquitination of HIF1 $\alpha$ .
- G The upper panel shows an immunoblotting analysis for the half-life of the HIF1 $\alpha$  protein in BT549 cells with GFP or HAUSP knockdown upon cycloheximide (CHX) treatment. The relative intensities of HIF1 $\alpha$  protein expression are quantified by ImageJ software and normalized to that in shGFP cells without CHX. The lower panel shows the quantitative results for the half-life of the HIF1 $\alpha$  protein in BT549 cells with GFP or HAUSP knockdown. The relative intensities of HIF1 $\alpha$  protein expression quantified by ImageJ software are normalized to that in shGFP or shHAUSP cells without CHX treatment. The dotted line indicates 50% abundance of HIF1 $\alpha$ , and the half-life ( $t_{1/2}$ ) HIF1 $\alpha$  protein.
- H Quantitative result for the half-life of the HIF1 $\alpha$  protein upon MIG-6 overexpression in BT549 cells with GFP or HAUSP knockdown upon CHX treatment. The relative intensities of HIF1 $\alpha$  protein expression quantified by ImageJ software are normalized to that in each group without CHX treatment. The dotted line indicates 50% abundance of HIF1 $\alpha$ , and the half-life ( $t_{1/2}$ ) HIF1 $\alpha$  protein.

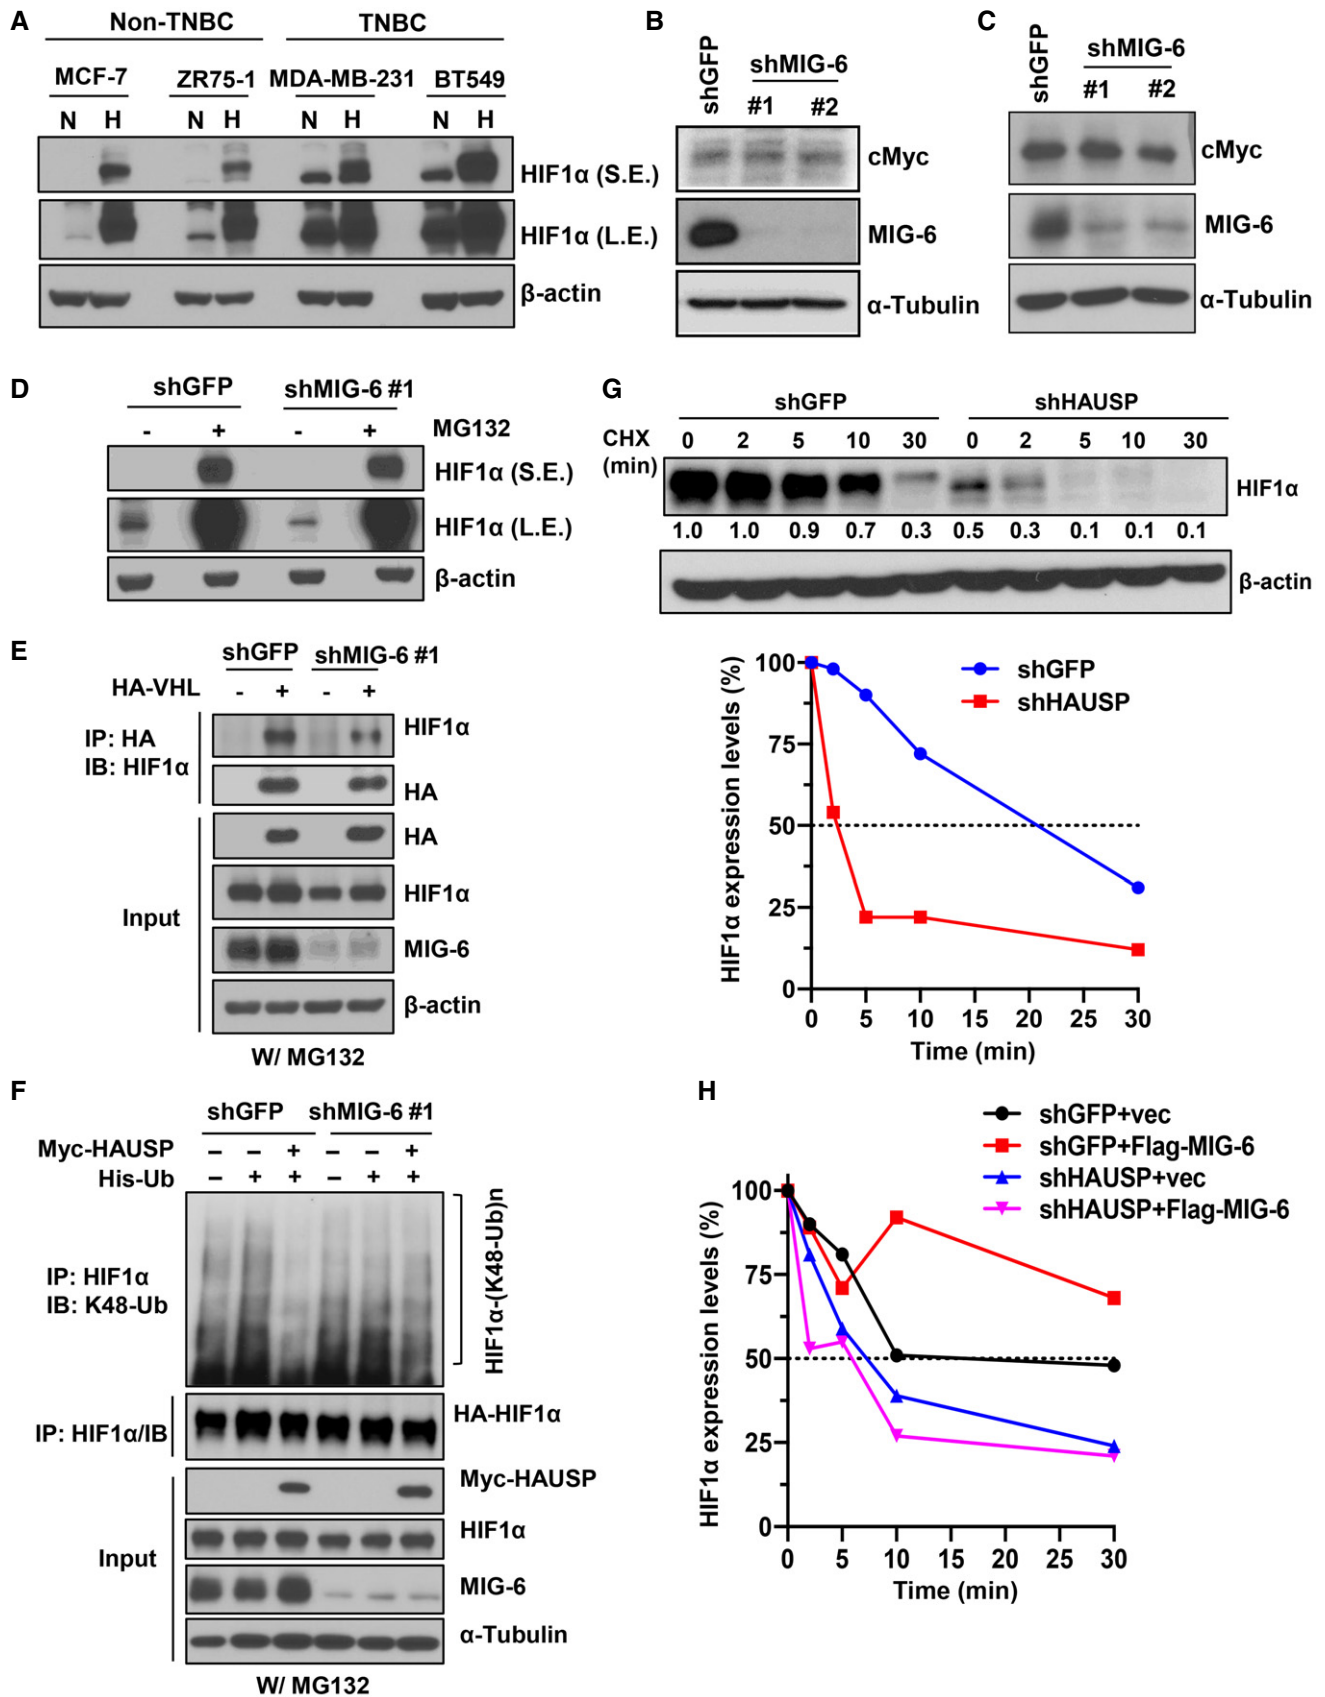

Figure EV5.
